# Supplementary material
Source: Springer Nature journal article supplement (https://www.springerprofessional.de/resource/supplementary/13638_2012_489_MOESM5_ESM.pdf/11897962)

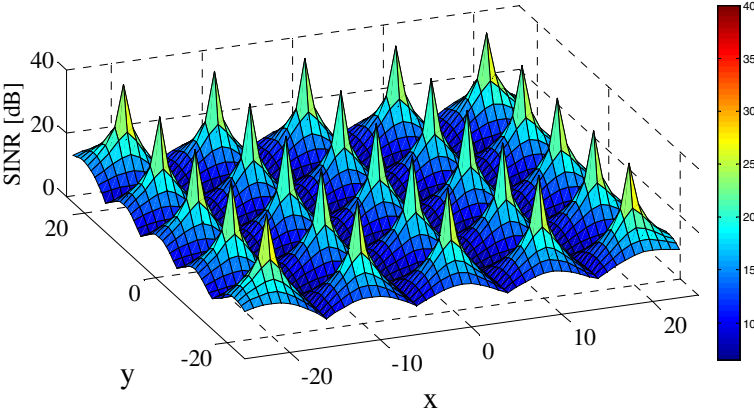

(a)

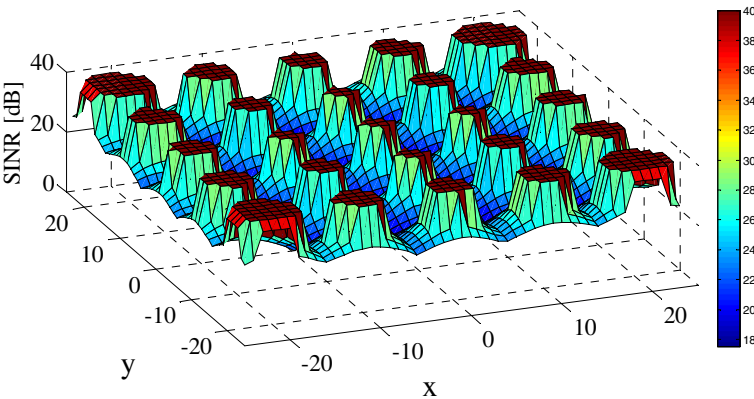

(b)

Supplement: MOESM5 [file 11897962]
